# Supplementary material for: High photocatalytic activity of carbon doped TiO2 prepared by fast combustion of organic capping ligands
Source: Royal Society of Chemistry journal article supplement (doi:10.1039/c5ra19058d), 2015-01-01
Supplement: c5ra19058d1.pdf [file c5ra19058d1.pdf]

## **High photocatalytic activity of carbon doped TiO<sub>2</sub> prepared by fast combustion of organic capping ligands**

Yijun Yang,<sup>a</sup> Dawei Ni,<sup>b</sup> Ye Yao,<sup>b</sup> Yeteng Zhong,<sup>a</sup> Ying Ma,<sup>\*b</sup> and Jiannian Yao<sup>\*a</sup>

<sup>a</sup> *Beijing National Laboratory for Molecular Science, Key Laboratory of Photochemistry, Institute of Chemistry, Chinese Academy of Sciences, Beijing, 100190, People's Republic of China. E-mail: jnyao@iccas.ac.cn;*

<sup>b</sup> *State Key Laboratory of Material Processing and Die & Mould Technology, School of Material Sciences and Engineering, Huazhong University of Science and Technology, Wuhan, 430074, People's Republic of China. E-mail: yingma@hust.edu.cn*

Figure S1. N1s XPS spectra of the carbon doped photocatalysts.

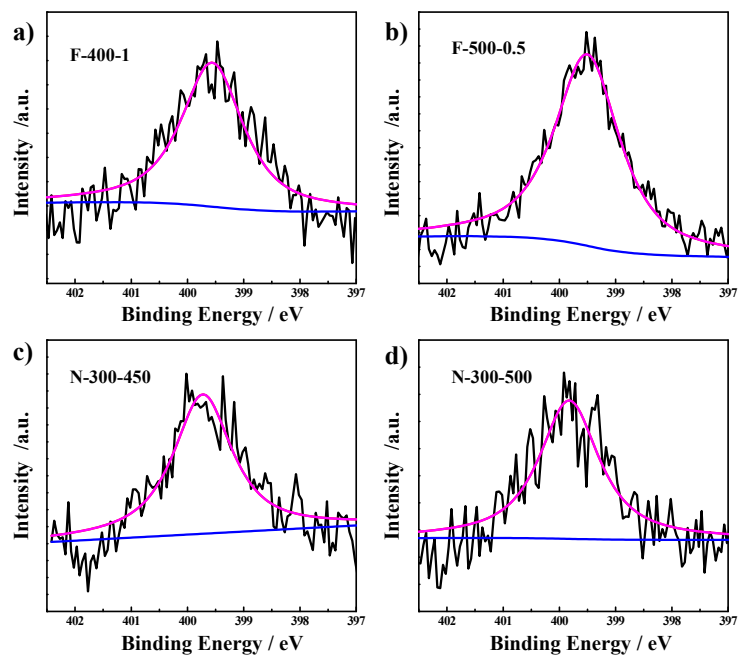

Figure S1. N1s XPS spectra of the carbon doped photocatalysts.
